# Supplementary material for: Mitotic polarization of transcription factors during asymmetric division establishes fate of forming cancer cells
Source: PubMed Central journal article supplement (PMC6013470; doi:10.1038/s41467-018-04663-1), 2018-06-21
Supplement: 41467_2018_4663_MOESM1_ESM.pdf [file 41467_2018_4663_MOESM1_ESM.pdf]

## **Liu et al Supplemental tables**

Supplementary table 1. Primers used for real-time PCR

| Primer name | Sequence                    | Tm °C | Amplicon (bp) |
|-------------|-----------------------------|-------|---------------|
| Mm Pten LP  | 5'- TGGATTCGACTTAGACTTGACCT | 55.3  | 182           |
| Mm Pten RP  | 5'- TGGCGGTGTCATAATGTCTCT   | 56.0  |               |
| Mm Bmi1 LP  | 5'- ATCCCCACTTAATGTGTGTCCT  | 55.9  | 116           |
| Mm Bmi1 RP  | 5'- CTTGCTGGTCTCCAAGTAACG   | 55.7  |               |
| Mm Zeb1 LP  | 5'- TGGCAAGACAACGTGAAAGA    | 60    | 200           |
| Mm Zeb1 RP  | 5'- AACTGGGAAAATGCATCTGG    | 60    |               |
| Mm Zeb2 LP  | 5'- TAGCCGGTCCAGAAGAAATG    | 60.0  | 156           |
| Mm Zeb2 RP  | 5'- GGCCATCTCTTTCCTCCAGT    | 61.0  |               |
| Mm ACTB LP  | 5'- GGCTGTATCCCCTCCATCG     | 57.6  | 154           |
| Mm ACTB RP  | 5'- CCAGTTGGTAACAATGCCATGT  | 55.9  |               |

Supplementary table 2. Primers used for detecting miRs

| Primer name      | Sequence                    | Tm °C | Amplicon (bp) |
|------------------|-----------------------------|-------|---------------|
| Mm mir200c LP    | 5'- TAATACTGCCGGGTAATGATGGA | 55.6  | 68            |
| Mm mir200b LP    | 5'- TAATACTGCCTGGTAATGATGA  | 51    | 68            |
| Mm mir200a LP    | 5'- TAACACTGTCTGGTAACGATGT  | 53.5  | 68            |
| Mm miACTB LP     | 5'- GGCTGGCCTGTACACTGACTTGA | 61.1  | 110           |
| Mm miGAPDH LP    | 5'- CACTGAGCATCTCCCTCACA    | 56.6  | 155           |
| Universal miR RP | 5'- GCGAGCACAGAATTAATACGAC  | 53.9  |               |

Supplementary table 3. Antibodies

| Name                                           | Cat#           | Source              | Host   | Ab type    | diluent |
|------------------------------------------------|----------------|---------------------|--------|------------|---------|
| <b>Hypoxyprobe</b>                             | HP3-100 Kit    | hpi                 |        |            |         |
| <b>Akt / PKB[<math>\text{pS}^{473}</math>]</b> | 44-621G        | Invitrogen          | Rb     | Monoclonal | 1:100   |
| <b>Bmi-1, clone F6</b>                         | 05-637         | Millipore           | mouse  | Monoclonal | 1:200   |
| <b>( CD-44 ) HCAM ( IM7 )</b>                  | sc- 18849      | Santa Cruz          | Rat    | Monoclonal | 1:100   |
| <b>E-Cadherin</b>                              | 610181         | BD Transduction Lab | mouse  | Monoclonal | 1:50    |
| <b>IL-6 ( M-19 )</b>                           | sc-1265        | Santa Cruz          | Goat   | Polyclonal | 1:200   |
| <b>PTEN(N-19)</b>                              | sc-6818        | Santa Cruz          | Goat   | Polyclonal | 1:50    |
| <b>TGF-<math>\beta</math>1 ( V )</b>           | sc-146         | Santa Cruz          | Rabbit | Polyclonal | 1:100   |
| <b>YAP</b>                                     | 4912           | Cell Signaling      | Rabbit | Polyclonal | 1:250   |
| <b>Zeb1</b>                                    | Liu et al 2008 | Douglas S. Darling  | Rb     | Polyclonal | 1:500   |
| <b>SIP1(H-260) (ZEB2)</b>                      | sc-48789       | Santa Cruz          | Rb     | Polyclonal | 1:200   |
